**Table S2.** Adjusted mean values in  $\Delta(\text{FEF}_{25-75\%}/\text{FVC})$  over 11 years of follow-up comparing different *SERPINA1* genotypes.

| <b>All</b>                                 | $\Delta(\text{FEF}_{25-75\%}/\text{FVC})$ (% $\circ$ /y) | 95%CI            | p-value |
|--------------------------------------------|----------------------------------------------------------|------------------|---------|
| MM, n=4207                                 | -13.09                                                   | -13.56 to -12.62 |         |
| MS, n=356                                  | -13.65                                                   | -15.28 to -12.01 | 0.52    |
| MZ, n=112                                  | -15.80                                                   | -18.70 to -12.89 | 0.07    |
| <b>Ever smokers</b>                        |                                                          |                  |         |
| MM, n=2194                                 | -12.77                                                   | -13.51 to -12.04 |         |
| MS, n=179                                  | -13.75                                                   | -16.05 to -11.44 | 0.42    |
| MZ, n=52                                   | -17.37                                                   | -21.59 to -13.15 | 0.03    |
| <b>Persistent smokers</b>                  |                                                          |                  |         |
| MM, n=922                                  | -12.50                                                   | -14.57 to -10.43 |         |
| MS, n=74                                   | -13.68                                                   | -17.55 to -9.82  | 0.52    |
| MZ, n=18                                   | -21.58                                                   | -28.94 to -14.22 | 0.01    |
| <b>Obese subjects</b>                      |                                                          |                  |         |
| MM, n=653                                  | -9.33                                                    | -12.45 to -6.21  |         |
| MS, n=55                                   | -10.01                                                   | -15.16 to -4.87  | 0.76    |
| MZ, n=16                                   | -17.67                                                   | -26.07 to -9.28  | 0.04    |
| <b>Subjects in upper tertile of hs-CRP</b> |                                                          |                  |         |
| MM, n=1387                                 | -13.05                                                   | -14.02 to -12.07 |         |
| MS, n=99                                   | -16.77                                                   | -20.07 to -13.47 | 0.03    |
| MZ, n=36                                   | -20.80                                                   | -26.21 to -15.38 | 0.006   |

Covariates included sex, linear and squared age, recruiting area, smoking history (packyears at baseline, as well as linear and squared packyears between baseline and follow-up), height, baseline BMI and BMI change between baseline and follow-up. Persistent smokers were classified as subjects who declared current smoking at both examinations. Obese subjects were defined as BMI  $\geq 30\text{kg}/\text{m}^2$  at the baseline or follow-up examination. Subjects in the upper tertile of hs-CRP had blood levels of  $\geq 1.8$  mg/l.
